# Supplementary material for: Integrated Vibration Control of In‐Wheel Motor‐Suspensions Coupling System via Dynamics Parameter Optimization
Source: Hindawi journal article supplement (doi:10.1155/2019/3702919), 2019-01-01
Supplement: f1 [file 3702919.f1.zip]

Archive with 36 entries (30 files):
- 3702919.f1/MATLAB Codes/
- 3702919.f1/MATLAB Codes/AFSA/
- 3702919.f1/MATLAB Codes/AFSA/AF_dist.m
- 3702919.f1/MATLAB Codes/AFSA/AF_follow.m
- 3702919.f1/MATLAB Codes/AFSA/AF_foodconsistence.m
- 3702919.f1/MATLAB Codes/AFSA/AF_init.m
- 3702919.f1/MATLAB Codes/AFSA/AF_prey.asv
- 3702919.f1/MATLAB Codes/AFSA/AF_prey.m
- 3702919.f1/MATLAB Codes/AFSA/AF_swarm.m
- 3702919.f1/MATLAB Codes/AFSA/draw1.asv
- 3702919.f1/MATLAB Codes/AFSA/draw1.m
- 3702919.f1/MATLAB Codes/AFSA/func.m
- 3702919.f1/MATLAB Codes/AFSA/odemain2.asv
- 3702919.f1/MATLAB Codes/AFSA/odemain2.m
- 3702919.f1/MATLAB Codes/GA/
- 3702919.f1/MATLAB Codes/GA/Code.m
- 3702919.f1/MATLAB Codes/GA/Cross.m
- 3702919.f1/MATLAB Codes/GA/fun.m
- 3702919.f1/MATLAB Codes/GA/func.m
- 3702919.f1/MATLAB Codes/GA/GAmain.asv
- 3702919.f1/MATLAB Codes/GA/GAmain.m
- 3702919.f1/MATLAB Codes/GA/Mutation.m
- 3702919.f1/MATLAB Codes/GA/odemain2.m
- 3702919.f1/MATLAB Codes/GA/Select.m
- 3702919.f1/MATLAB Codes/GA/test.m
- 3702919.f1/MATLAB Codes/SIMULATION/
- 3702919.f1/MATLAB Codes/SIMULATION/bump road excitation/
- 3702919.f1/MATLAB Codes/SIMULATION/bump road excitation/func.asv
- 3702919.f1/MATLAB Codes/SIMULATION/bump road excitation/func.m
- 3702919.f1/MATLAB Codes/SIMULATION/bump road excitation/odemain.asv
- 3702919.f1/MATLAB Codes/SIMULATION/bump road excitation/odemain.m
- 3702919.f1/MATLAB Codes/SIMULATION/rough road excitation/
- 3702919.f1/MATLAB Codes/SIMULATION/rough road excitation/func.asv
- 3702919.f1/MATLAB Codes/SIMULATION/rough road excitation/func.m
- 3702919.f1/MATLAB Codes/SIMULATION/rough road excitation/odemain.asv
- 3702919.f1/MATLAB Codes/SIMULATION/rough road excitation/odemain.m
