# Supplementary material for: Integrated Vibration Control of In‐Wheel Motor‐Suspensions Coupling System via Dynamics Parameter Optimization
Source: Hindawi journal article supplement (doi:10.1155/2019/3702919), 2019-01-01
Supplement: f1 [file 3702919.f1.zip › 3702919.f1/MATLAB Codes/AFSA/AF_dist.m]

function D=AF_dist( Xi,X )
%¼ÆËãµÚiÌõÓãÓëËùÓÐÓãµÄÎ»ÖÃ£¬°üÀ¨±¾Éí
%ÊäÈë£º
%Xi       µÚiÌõÓãµÄµ±Ç°Î»ÖÃ
%X        ËùÓÐÓãµÄµ±Ç°Î»ÖÃ

%Êä³ö£º
%D        µÚiÌõÓãÓëËùÓÐÓãµÄ¾àÀë
col=size(X,2);             %ÇóXµÃÁÐÊý£¬Ò²¾ÍÊÇµÃµ½×Ü¹²µÄÓãµÄÊýÄ¿
D=zeros(1,col);            %Éú³É³õÊ¼»¯Áã¾ØÕóD£¬Ä¿µÄÊÇÓÃÓÚ±£´æµÚiÌõÓãÓëËùÓÐÓãµÄÎ»ÖÃ
for j=1:col                
    D(j)=norm(Xi-X(:,j));  %D¾ØÕó±£´æµÚiÌõÓãÓëËùÓÐÓãµÄÎ»ÖÃ£¬°üÀ¨±¾Éí(normÓÃÓÚ¼ÆËãXiÓëµÚX(:,j)µÄÏòÁ¿²îµÄ³¤¶È)
end

end
