# Supplementary material for: Integrated Vibration Control of In‐Wheel Motor‐Suspensions Coupling System via Dynamics Parameter Optimization
Source: Hindawi journal article supplement (doi:10.1155/2019/3702919), 2019-01-01
Supplement: f1 [file 3702919.f1.zip › 3702919.f1/MATLAB Codes/AFSA/AF_follow.m]

function [Xnext,Ynext]=AF_follow(X,i,visual,step,delta,try_number,LBUB,lastY)
%Î²ËæÐÐÎª
%ÊäÈë£º
%Xi          µ±Ç°ÈË¹¤ÓãµÄÎ»ÖÃ
%i           µ±Ç°ÈË¹¤ÓãµÄÐòºÅ
%visual      ¸ÐÖª·¶Î§
%step        ×î´óÒÆ¶¯²½³¤
%try_number  ×î´ó³¢ÊÔ´ÎÊý
%LBUB        ¸÷¸öÊýµÄÉÏÏÂÏÞ
%lastY       ÉÏ´ÎµÄ¸÷¸öÈË¹¤ÓãµÄÎ»ÖÃµÄÊ³ÎïÅ¨¶È

%Êä³ö£º
%Xnext       XiÈË¹¤ÓãµÄÏÂÒ»¸öÎ»ÖÃ
%Ynext       XiÈË¹¤ÓãµÄÏÂÒ»¸öÎ»ÖÃµÄÊ³ÎïÅ¨¶È
Xi=X(:,i);                    %Xi´ú±íµÚiÌõÓã£¨µÚiÁÐ£©
D=AF_dist(Xi,X);              %Ëã³öµÚiÌõÓãÓëËùÓÐÓãµÄÎ»ÖÃ£¬°üÀ¨±¾Éí
index=find(D>0&D<visual);     %ÅÐ¶Ï¾àÀëÊÇ·ñÔÚ¸ÐÖª·¶Î§
nf=length(index);             %»ñµÃÑ­»·´ÎÊý
if nf>0                                              %Èô¾àÀë²»ÔÙÊÓÒ°·¶Î§ÄÚ£¬ÔòÖ´ÐÐÃÙÊ³ÐÐÎª
    XX=X(:,index);                                   %XX´æ´¢ÊÓÒ°·¶Î§ÄÚµÄÓãÈº
    YY=lastY(:,index);                               %YY´æ´¢XXÓãÈºÖÐ¶ÔÓ¦µÄÊ³ÎïÃÜ¶È
    [Ymax,Max_index]=max(YY);                        %½«YYÖÐµÄ×î´óÖµ¸øYmax£¬Í¬Ê±°Ñ¶ÔÓ¦µÄÓãµÄÎ»ÖÃ¸øMax_index
    Xmax=XX(:,Max_index);                            %Xmax´æµØÖ·Max_index
    Yi=lastY(i);                                       
    if Ymax/nf>delta*Yi                              %±íÃ÷»ï°éÖÐÐÄÓÐ½Ï¶àÊ³ÎïÇÒ²»Ì«Óµ¼·£¬Ôò³¯×Å»ï°éµÄÖÐÐÄÎ»ÖÃÏòÇ°Ò»²½£¬·ñÔòÖ´ÐÐÃÙÊ³ÐÐÎª  
        Xnext=Xi+rand*step*(Xmax-Xi)/norm(Xmax-Xi);  %³¯×ÅÊ³ÎïÃÜ¶È×î´óÎ»ÖÃÏòÇ°Ò»²½£¬µ«ÊÇ±£Ö¤ÈÔÈ»ÔÚ·¶Î§ÄÚ
        for i=1:length(Xnext)
            if Xnext(i)>LBUB(i,2)
                Xnext(i)=LBUB(i,2);
            end
            if Xnext(i)<LBUB(i,1)
                Xnext(i)=LBUB(i,1);
            end
        end
        Ynext=AF_foodconsistence(Xnext);
    else
        [Xnext,Ynext]=AF_prey(Xi,i,visual,step,try_number,LBUB,lastY);
    end
else
  [Xnext,Ynext]=AF_prey(Xi,i,visual,step,try_number,LBUB,lastY);
end
     
     
 
end
