# Supplementary material for: Integrated Vibration Control of In‐Wheel Motor‐Suspensions Coupling System via Dynamics Parameter Optimization
Source: Hindawi journal article supplement (doi:10.1155/2019/3702919), 2019-01-01
Supplement: f1 [file 3702919.f1.zip › 3702919.f1/MATLAB Codes/AFSA/AF_foodconsistence.m]

function [ Y ] =AF_foodconsistence(X)
%¼ÆËãÈË¹¤ÓãµÄµ±Ç°Î»ÖÃµÄÊ³ÎïÅ¨¶È
%ÊäÈë£º
%X      ´ýÇóµÄÈË¹¤Óã£¬Ã¿Ò»ÁÐÎªÒ»ÌõÈË¹¤Óã

%Êä³ö£º
%Y      Êä³ö¸÷ÌõÈË¹¤Óãµ±Ç°Î»ÖÃµÄÊ³ÎïÅ¨¶È£¨¼´º¯ÊýÖµ£©
fishnum=size(X,2);
for i=1:fishnum
    foodc=odemain2(X,i);
    Y(1,i)=1/foodc;
end

end
