# Supplementary material for: Integrated Vibration Control of In‐Wheel Motor‐Suspensions Coupling System via Dynamics Parameter Optimization
Source: Hindawi journal article supplement (doi:10.1155/2019/3702919), 2019-01-01
Supplement: f1 [file 3702919.f1.zip › 3702919.f1/MATLAB Codes/AFSA/AF_init.m]

function X = AF_init( Nfish,lb_ub )
%ÊäÈë£º
%NfishÓãÈº´óÐ¡
%lb_ubÓãµÄ»î¶¯·¶Î§

%Êä³ö£º
%X ²úÉúµÄ³õÊ¼ÈË¹¤ÓãÈº

row=size(lb_ub,1);       %µÃµ½lb_ubµÄÐÐÊý
X=[];
for i=1:row
    lb=lb_ub(i,1);       %lbÈ¡µÚiÐÐµÄµÚ1ÁÐ£¬¼´È¡ÂúËùÓÐµÄÏÂÏÞÖµ
    ub=lb_ub(i,2);       %ubÈ¡µÚiÐÐµÄµÚ2ÁÐ£¬¼´È¡ÂúËùÓÐµÄÉÏÏÞÖµ
    nr=lb_ub(i,3);       %nrÈ¡µÚiÐÐµÄµÚ3ÁÐ£¬¼´È¡ÂúËùÓÐµÄlb_ub·¶Î§ÄÚµÄÊý
    for j=1:nr
        X(end+1,:)=lb+(ub-lb)*rand(1,Nfish);%Éú³ÉX¾ØÕó£¬¼´ËùÓÐµÄÓã£¨Ã¿ÐÐ£©ÒÔ¼°Æä°üº¬µÄÊý¾Ý£¨Ã¿ÁÐ£©
    end
end
end
