# Supplementary material for: Integrated Vibration Control of In‐Wheel Motor‐Suspensions Coupling System via Dynamics Parameter Optimization
Source: Hindawi journal article supplement (doi:10.1155/2019/3702919), 2019-01-01
Supplement: f1 [file 3702919.f1.zip › 3702919.f1/MATLAB Codes/AFSA/AF_prey.m]

function [Xnext,Ynext]=AF_prey(Xi,i,visual,step,try_number,LBUB,lastY)
%ÃÙÊ³ÐÐÎª
%ÊäÈë£º
%Xi          µ±Ç°ÈË¹¤ÓãµÄÎ»ÖÃ
%i           µ±Ç°ÈË¹¤ÓãµÄÐòºÅ
%visual      ¸ÐÖª·¶Î§
%step        ×î´óÒÆ¶¯²½³¤
%try_number  ×î´ó³¢ÊÔ´ÎÊý
%LBUB        ¸÷¸öÊýµÄÉÏÏÂÏÞ
%lastY       ÉÏ´ÎµÄ¸÷ÈË¹¤ÓãµÄÎ»ÖÃµÄÊ³ÎïÅ¨¶È
%Êä³ö£º
%Xnext       XiÈË¹¤ÓãµÄÏÂÒ»¸öÎ»ÖÃ
%Ynext       XiÈË¹¤ÓãµÄÏÂÒ»¸öÎ»ÖÃµÄÊ³ÎïÅ¨¶È
Xnext=[];
Yi=lastY(i);
for i=1:try_number
    Xj=Xi+(2*rand(length(Xi),1)-1)*visual;       %ÔÚ¸ÐÖª·¶Î§ÄÚÒÆ¶¯Ò»²½£¬Ñ¡ÔñÒ»¸ö×´Ì¬Xj
    Yj=AF_foodconsistence(Xj);                   %µÃµ½µ±Ç°Î»ÖÃXjµÄÊ³ÎïÅ¨¶È
    if Yi<Yj                                     %±È½ÏÊ³ÎïÅ¨¶È£¬»ñµÃ×î´óÖµ£¨»òÔÚÇó¼«Ð¡ÎÊÌâÖÐ£¬Yi>Yj£¬¼«´óºÍ¼«Ð¡Ìâ¿ÉÒÔ»¥Ïà×ª»»£¬ÒÔÏÂ¾ùÒÔÇó¼«´óÎÊÌâÌÖÂÛ£©
        Xnext=Xi+rand*step*(Xj-Xi)/norm(Xj-Xi);  %µÃµ½ÈË¹¤ÓãXiµÄÏÂÒ»¸öÎ»ÖÃ=µ±Ç°Î»ÖÃXi+Ëæ»úÊý*×î´óÒÆ¶¯²½³¤/ÒÆ¶¯·½Ïò
        for i=1:length(Xnext)                    %È·±£XnextµÄÎ»ÖÃÔÚÉÏÏÂÏÞÖ®ÄÚ
            if Xnext(i)>LBUB(i,2)                %ÓëÉÏÏÞ(×î´óÖµ)×÷±È½Ï       
               Xnext(i)=LBUB(i,2);               
            end
            if Xnext(i)<LBUB(i,1)                %ÓëÏÂÏÞ(×îÐ¡Öµ)×÷±È½Ï               
               Xnext(i)=LBUB(i,1);
            end
        end
        Xi=Xnext;                                %µÃµ½ÐÂµÄµ±Ç°Î»ÖÃ 
        break
    end 
    
end
%Ëæ»úÐÐÎª
 if isempty(Xnext)                               %ÈôXnextÖÐÎª¿Õ£¬ÔòÖ´ÐÐËæ»úÐÐÎª
     Xj=Xi+(2*rand(length(Xi),1)-1)*visual;
     Xnext=Xj;                        %µÃµ½ÈË¹¤ÓãXiµÄÏÂÒ»¸öÎ»ÖÃ=µ±Ç°Î»ÖÃXi+Ëæ»úÊý*×î´óÒÆ¶¯²½³¤
        for i=1:length(Xnext)                    %È·±£XnextµÄÎ»ÖÃÔÚÉÏÏÂÏÞÖ®ÄÚ
            if Xnext(i)>LBUB(i,2)                
               Xnext(i)=LBUB(i,2);
            end
            if Xnext(i)<LBUB(i,1)                 
               Xnext(i)=LBUB(i,1);
            end
        end    
 end
 Ynext=AF_foodconsistence(Xnext);                %Êä³öÈË¹¤ÓãµÄÏÂÒ»¸öÎ»ÖÃµÄÊ³ÎïÅ¨¶È
end
