# Supplementary material for: Integrated Vibration Control of In‐Wheel Motor‐Suspensions Coupling System via Dynamics Parameter Optimization
Source: Hindawi journal article supplement (doi:10.1155/2019/3702919), 2019-01-01
Supplement: f1 [file 3702919.f1.zip › 3702919.f1/MATLAB Codes/AFSA/AF_swarm.m]

function [Xnext,Ynext]=AF_swarm(X,i,visual,step,delta,try_number,LBUB,lastY)
%¾ÛÈºÐÐÎª
%ÊäÈë£º
%X           ËùÓÐÈË¹¤ÓãµÄÎ»ÖÃ
%i           µ±Ç°ÈË¹¤ÓãµÄÐòºÅ
%visual      ¸ÐÖª·¶Î§
%step        ×î´óÒÆ¶¯²½³¤
%delta       Óµ¼·¶È
%try_number  ×î´ó³¢ÊÔ´ÎÊý
%LBUB        ¸÷¸öÊýµÄÉÏÏÂÏÞ
%lastY       ÉÏ´ÎµÄ¸÷¸öÈË¹¤ÓãµÄÎ»ÖÃµÄÊ³ÎïÅ¨¶È
%Êä³ö£º
%Xnext       XiÈË¹¤ÓãµÄÏÂÒ»¸öÎ»ÖÃ
%Ynext       XiÈË¹¤ÓãµÄÏÂÒ»¸öÎ»ÖÃµÄÊ³ÎïÅ¨¶È
Xi=X(:,i);                                       %·ÖÅä¸øXi¶ÔÓ¦µÄÎ»ÖÃÏòÁ¿  
D=AF_dist(Xi,X);                                 %D´æ´¢µÚiÌõÓãÓëËùÓÐÓãµÄÎ»ÖÃµÄ¾àÀë£¬°üÀ¨±¾Éí
index=find(D>0&D<visual);                        %µÃµ½´óÓÚ0ÇÒ´¦ÓÚÊÓ¾õ·¶Î§ÄÚËù¶ÔÓ¦µÄXiµÄÎ»ÖÃ´æÔÚindex
nf=length(index);                                %»ñµÃÑ­»·´ÎÊý
if nf>0                                          %Èô¾àÀë²»ÔÙÊÓÒ°·¶Î§ÄÚ£¬ÔòÖ´ÐÐÃÙÊ³ÐÐÎª
    for j=1:size(X,1)                            
        Xc(j,1)=mean(X(j,index));                %¶ÔÓÚ´¦ÓÚÊÓ¾õ·¶Î§ÄÚµÄÓãÇóÈ¡Æä¸÷¸ö²ÎÊýµÄ¾ùÖµ×÷ÎªÎ»ÖÃXcÖÐÑëµÄ×ø±ê
    end
    Yc=AF_foodconsistence(Xc);                   %ÖÐÐÄÎ»ÖÃXc½øÐÐÊ³ÎïÅ¨¶È¼ÆËã
    Yi=lastY(i);
    if Yc/nf>delta*Yi                            %±íÃ÷»ï°éÖÐÐÄÓÐ½Ï¶àÊ³ÎïÇÒ²»Ì«Óµ¼·£¬Ôò³¯×Å»ï°éµÄÖÐÐÄÎ»ÖÃÏòÇ°Ò»²½£¬·ñÔòÖ´ÐÐÃÙÊ³ÐÐÎª
        Xnext=Xi+rand*step*(Xc-Xi)/norm(Xc-Xi);  %ÏòÇ°Ò»²½£¬µ«ÊÇ±£Ö¤ÈÔÈ»ÔÚ·¶Î§ÄÚ
        for i=1:length(Xnext)
            if Xnext(i)>LBUB(i,2)
                Xnext(i)=LBUB(i,2);
            end
            if Xnext(i)<LBUB(i,1)
                Xnext(i)=LBUB(i,1);
            end
        end
        Ynext=AF_foodconsistence(Xnext);
    else
        [Xnext,Ynext]=AF_prey(Xi,i,visual,step,try_number,LBUB,lastY); %½øÐÐÃÙÊ³ÐÐÎª
    end
else
  [Xnext,Ynext]=AF_prey(Xi,i,visual,step,try_number,LBUB,lastY);
end 
end
