# Supplementary material for: Integrated Vibration Control of In‐Wheel Motor‐Suspensions Coupling System via Dynamics Parameter Optimization
Source: Hindawi journal article supplement (doi:10.1155/2019/3702919), 2019-01-01
Supplement: f1 [file 3702919.f1.zip › 3702919.f1/MATLAB Codes/AFSA/draw1.m]

clc
clear all
close all
tic                                %¼ÆÊ±
figure(1);
figure(2);
figure(3);
figure(4);
figure(5);
global MAL;
MAL=0;
fishnum=15;                        %ÈË¹¤ÓãÊý
MAXGEN=1000;                         %×î´óµü´ú´ÎÊý
try_number=2;                     %ÃÙÊ³×î´óÊÔÌ½´ÎÊý
visual=5;                         %¸ÐÖª¾àÀë
delta=1/(0.9*2);                       %Óµ¼·¶ÈÒò×Ó
step=0.5;                          %ÒÆ¶¯²½³¤
lb_ub=[45,60,1;310,350,1;20,80,1;8,20,1;10,30,1;10,80,1;10,30,1;10,35,1;];%[45,60,1;310,350,1;20,80,1;8,20,1;10,30,1;20,80,1;10,30,1;10,35,1;]; ¸÷²ÎÊýÈ¡ÖµµÄÇø¼ä·¶Î§                 
%lb_ubÃ¿ÐÐÇ°2¸öÊýÊÇ·¶Î§µÄÉÏÏÂÏÞ£¬µÚ3¸öÊýÊÇÔÚ¸Ã·¶Î§ÄÚµÄÊýµÄ¸öÊý¡£×Ü¹²È¡8¸öÊý¡£
X=AF_init(fishnum,lb_ub);          %µ÷ÓÃAF_init½øÐÐ³õÊ¼»¯
LBUB=[];                           %¸÷¸öÊýµÄÉÏÏÂÏÞ
FD=[];
M1=[];
M3=[];
M4=[];
M5=[];
K3=[];
C3=[];
K4=[];
C4=[];
K6=[];
C6=[];
YY=[];
for i=1:size(lb_ub,1)
    LBUB=[LBUB;repmat(lb_ub(i,1:2),lb_ub(i,3),1)];%Éú³É¸÷¸öÊýµÄÉÏÏÂÏÞ
    %lb_ub(i,1:2)¼´ÖØ¸´¾ØÕólb_ubµÄµÚiÐÐµÄµÚ1¸öºÍµÚ2¸öÔªËØ£¨ÖØ¸´ÏÂÏÞÖµlbºÍÉÏÏÞÖµub£©
    %lb_ub(i,3)¼´ÖØ¸´lb_ubµÄµÚiÐÐµÄµÚÈý¸öÔªËØÊýÖµµÄÐÐÊý
    %ÖØ¸´1ÁÐ
end
gen=1;                             %´ÓµÚÒ»´ú¿ªÊ¼
BestY=-1*ones(1,MAXGEN);           %Ã¿²½ÖÐ×îÓÅµÄº¯ÊýÖµ(³õÊ¼»¯Îª1*MAXGENµÄ¸ºµ¥Î»¾ØÕó)
BestX=-1*ones(8,MAXGEN);          %±äÁ¿Ã¿²½ÖÐ×îÓÅµÄ×Ô±äÁ¿(³õÊ¼»¯Îª8*MAXGENµÄ¸ºµ¥Î»¾ØÕó)
besty=-100;                        %×îÓÅº¯ÊýÖµ
Y=AF_foodconsistence(X);           %¼ÆËãµ±Ç°Î»ÖÃÊ³ÎïÅ¨¶È£¬µ÷ÓÃAF_foodconsistence
while gen<=MAXGEN                  %µü´ú´ÎÊýÎªMAXGEN
    fprintf(1,'%d\n',gen);         %ÒÔ±ê×¼Êä³ö·½Ê½Êä³öµ½ÆÁÄ»µ±Ç°µü´ú´ÎÊý
    for i=1:fishnum                %Ñ­»·´ÎÊýÎªÈË¹¤ÓãÊýÄ¿
        [Xi1,Yi1]=AF_swarm(X,i,visual,step,delta,try_number,LBUB,Y);  %¾ÛÈºÐÐÎª£¬µ÷ÓÃAF_swarm£¬½«Xnext¸³Öµ¸øXi1£¬Ynext¸³Öµ¸øYi1
        [Xi2,Yi2]=AF_follow(X,i,visual,step,delta,try_number,LBUB,Y); %×·Î²ÐÐÎª£¬µ÷ÓÃAF_follow£¬½«Xnext¸³Öµ¸øXi2£¬Ynext¸³Öµ¸øYi2
        if Yi1>Yi2                 %ÈôYi2£¨ÓÉ×·Î²ÐÐÎªµÃµ½µÄµ±Ç°Î»ÖÃµÄÊ³ÎïÃÜ¶È£©Ð¡ÓÚYi1£¨ÓÉ¾ÛÈºÐÐÎªµÃµ½µÄµ±Ç°Î»ÖÃµÄÊ³ÎïÃÜ¶È£©
            X(:,i)=Xi1;            %ÔòÊ¹µÃXi1£¨½Ï´óÊ³ÎïÃÜ¶ÈµÄÎ»ÖÃ£©³ÉÎªXµÄµÚiÁÐµÄÖµ
            Y(1,i)=Yi1;            %ÔòÊ¹µÃYi1£¨½Ï´óÊ³ÎïÃÜ¶ÈÖµ£©³ÉÎªYµÄµÚÒ»ÐÐµÚiÁÐµÄÖµ
        else
             X(:,i)=Xi2;      
             Y(1,i)=Yi2;
        end                        %Í¬Àí£¬¾­¹ýÕâ¶ÎÑ­»·ÔòÊ¹X±£´æÃ¿´Îµü´ú´óÊ³ÎïÃÜ¶ÈµÄÎ»ÖÃ£»YµÄµÚÒ»ÐÐ±£´æÃ¿´Îµü´ú´óÊ³ÎïÃÜ¶ÈÖµ
    end                       
    [Ymax,index]=max(Y);           %·µ»ØYÖÐµÄ×î´óÖµ£¬²¢¸ø³ö¾ßÌåµÄÎ»ÖÃ¸øindex
    if Ymax>besty                  %ÅÐ¶ÏYmax£¨ÕâÒ»´ú×îÓÅµÄÖµ£©ÊÇ·ñ³¬¹ýbesty£¨×îÓÅº¯ÊýÖµ£©               
        besty=Ymax;                %×îÓÅº¯ÊýÖµ±£´æYmax£¨YÖÐµÄ×î´óÖµ£©
        bestx=X(:,index);          %Ê¹bestxµÃ±£´æ¶ÔÓ¦µÄÎ»ÖÃ×ø±ê
        BestY(gen)=Ymax;           %BestYÖÐ´æ·Å´Ë´Îµü´úµÄ×îÓÅÊ³ÎïÃÜ¶ÈÖµYmax
        BestX(:,gen)=X(:,index);   %BestXÖÐ´æ·ÅYmax¶ÔÓ¦µÄÓãµÄÎ»ÖÃ
    else
        BestY(gen)=BestY(gen-1);
        BestX(:,gen)=BestX(:,gen-1); 
    end
    figure(10)
    plot(gen,'s-')                        
    M1(1,gen)=BestX(1,gen);
    M3(1,gen)=BestX(2,gen);   
    K3(1,gen)=1000*BestX(3,gen);
    C3(1,gen)=100*BestX(4,gen);
    K4(1,gen)=1000*BestX(5,gen);
    C4(1,gen)=10*BestX(6,gen);
    K6(1,gen)=1000*BestX(7,gen);
    C6(1,gen)=1000*BestX(8,gen);
    YY(1,gen)=Ymax; 
    gen=gen+1;
end
figure(1)
plot(1:MAXGEN,BestY,'s-')                         %»­³öÃ¿Ò»´ú¶ÔÓ¦µÄ×î´óÊ³ÎïÃÜ¶ÈÖµ
xlabel('generations');
ylabel('fitness');
disp(['m1=',num2str(bestx(1))]);  
disp(['m3=',num2str(bestx(2))]); 
disp(['k3=',num2str(1000*bestx(3))]); 
disp(['c3=',num2str(100*bestx(4))]); 
disp(['k4=',num2str(1000*bestx(5))]); 
disp(['c4=',num2str(10*bestx(6))]); 
disp(['k6=',num2str(1000*bestx(7))]); 
disp(['c6=',num2str(1000*bestx(8))]); 
disp(['Y=',num2str(besty)]);  
figure(2)
hold on
plot(1:MAXGEN,M1,'*-');
ylabel('m1');
xlabel('generations');
figure(3)
hold on
plot(1:MAXGEN,M3,'*-');  
xlabel('generations')
ylabel('m3');
figure(4)
hold on
plot(1:MAXGEN,K3,'*-'); 
xlabel('generations')
ylabel('k3');
figure(5)
hold on
plot(1:MAXGEN,C3,'*-');   
xlabel('generations')
ylabel('c3');
figure(6)
hold on
plot(1:MAXGEN,K4,'*-'); 
xlabel('generations')
ylabel('k4');
figure(7)
hold on
plot(1:MAXGEN,C4,'*-'); 
xlabel('generations')
ylabel('c4');
figure(8)
hold on
plot(1:MAXGEN,K6,'*-');
xlabel('generations')
ylabel('k6');
figure(9)
hold on
plot(1:MAXGEN,C6,'*-');
xlabel('generations')
ylabel('c6');
toc
