# Supplementary material for: Integrated Vibration Control of In‐Wheel Motor‐Suspensions Coupling System via Dynamics Parameter Optimization
Source: Hindawi journal article supplement (doi:10.1155/2019/3702919), 2019-01-01
Supplement: f1 [file 3702919.f1.zip › 3702919.f1/MATLAB Codes/GA/Code.m]

function ret=Code(lenchrom,bound)
%±¾º¯Êý½«±äÁ¿±àÂë³ÉÈ¾É«Ìå£¬ÓÃÓÚËæ»ú³õÊ¼»¯Ò»¸öÖÖÈº
% lenchrom   input : È¾É«Ìå³¤¶È
% bound      input : ±äÁ¿µÄÈ¡Öµ·¶Î§
% ret        output: È¾É«ÌåµÄ±àÂëÖµ
flag=0;
while flag==0
    pick=rand(1,length(lenchrom));
    ret=bound(:,1)'+(bound(:,2)-bound(:,1))'.*pick; %ÏßÐÔ²åÖµ£¬±àÂë½á¹ûÒÔÊµÊýÏòÁ¿´æÈëretÖÐ
    flag=test(lenchrom,bound,ret);  
end
        
