# Supplementary material for: Integrated Vibration Control of In‐Wheel Motor‐Suspensions Coupling System via Dynamics Parameter Optimization
Source: Hindawi journal article supplement (doi:10.1155/2019/3702919), 2019-01-01
Supplement: f1 [file 3702919.f1.zip › 3702919.f1/MATLAB Codes/GA/Cross.m]

function ret=Cross(pcross,lenchrom,chrom,sizepop,bound)
%±¾º¯ÊýÍê³É½»²æ²Ù×÷
% pcorss                input  : ½»²æ¸ÅÂÊ
% lenchrom              input  : È¾É«ÌåµÄ³¤¶È
% chrom     input  : È¾É«ÌåÈº
% sizepop               input  : ÖÖÈº¹æÄ£
% ret                   output : ½»²æºóµÄÈ¾É«Ìå
 for i=1:sizepop  %Ã¿Ò»ÂÖforÑ­»·ÖÐ£¬¿ÉÄÜ»á½øÐÐÒ»´Î½»²æ²Ù×÷£¬È¾É«ÌåÊÇËæ»úÑ¡ÔñµÄ£¬½»²æÎ»ÖÃÒ²ÊÇËæ»úÑ¡ÔñµÄ£¬%µ«¸ÃÂÖforÑ­»·ÖÐÊÇ·ñ½øÐÐ½»²æ²Ù×÷ÔòÓÉ½»²æ¸ÅÂÊ¾ö¶¨£¨continue¿ØÖÆ£©
     % Ëæ»úÑ¡ÔñÁ½¸öÈ¾É«Ìå½øÐÐ½»²æ
     pick=rand(1,2);
     while prod(pick)==0
         pick=rand(1,2);
     end
     index=ceil(pick.*sizepop);
     % ½»²æ¸ÅÂÊ¾ö¶¨ÊÇ·ñ½øÐÐ½»²æ
     pick=rand;
     while pick==0
         pick=rand;
     end
     if pick>pcross
         continue;
     end
     flag=0;
     while flag==0
         % Ëæ»úÑ¡Ôñ½»²æÎ»
         pick=rand;
         while pick==0
             pick=rand;
         end
         pos=ceil(pick.*sum(lenchrom)); %Ëæ»úÑ¡Ôñ½øÐÐ½»²æµÄÎ»ÖÃ£¬¼´Ñ¡ÔñµÚ¼¸¸ö±äÁ¿½øÐÐ½»²æ£¬×¢Òâ£ºÁ½¸öÈ¾É«Ìå½»²æµÄÎ»ÖÃÏàÍ¬
         pick=rand; %½»²æ¿ªÊ¼
         v1=chrom(index(1),pos);
         v2=chrom(index(2),pos);
         chrom(index(1),pos)=pick*v2+(1-pick)*v1;
         chrom(index(2),pos)=pick*v1+(1-pick)*v2; %½»²æ½áÊø
         flag1=test(lenchrom,bound,chrom(index(1),:));  %¼ìÑéÈ¾É«Ìå1µÄ¿ÉÐÐÐÔ
         flag2=test(lenchrom,bound,chrom(index(2),:));  %¼ìÑéÈ¾É«Ìå2µÄ¿ÉÐÐÐÔ
         if   flag1*flag2==0
             flag=0;
         else flag=1;
         end    %Èç¹ûÁ½¸öÈ¾É«Ìå²»ÊÇ¶¼¿ÉÐÐ£¬ÔòÖØÐÂ½»²æ
     end
 end
ret=chrom;
