# Supplementary material for: Integrated Vibration Control of In‐Wheel Motor‐Suspensions Coupling System via Dynamics Parameter Optimization
Source: Hindawi journal article supplement (doi:10.1155/2019/3702919), 2019-01-01
Supplement: f1 [file 3702919.f1.zip › 3702919.f1/MATLAB Codes/GA/GAmain.m]

% Çå¿Õ»·¾³±äÁ¿
clc
clear
% 
% ÒÅ´«Ëã·¨²ÎÊý³õÊ¼»¯
tic
M1=[];
M3=[];
M4=[];
M5=[];
K3=[];
C3=[];
K4=[];
C4=[];
K6=[];
C6=[];
maxgen=1000;                         %½ø»¯´úÊý£¬¼´µü´ú´ÎÊý
sizepop=15;                         %ÖÖÈº¹æÄ£
pcross=[0.5];                       %½»²æ¸ÅÂÊÑ¡Ôñ£¬0ºÍ1Ö®¼ä
pmutation=[0.1];                    %±äÒì¸ÅÂÊÑ¡Ôñ£¬0ºÍ1Ö®¼ä
numsum=8;                           %±äÁ¿ÊýÁ¿
%½Úµã×ÜÊý
lenchrom=ones(1,numsum);        
bound=[45,60,1;310,350,1;20,80,1;8,20,1;10,30,1;20,80,1;10,30,1;10,50,1;];    %Êý¾Ý·¶Î§
%¸öÌå³õÊ¼»¯
individuals=struct('fitness',zeros(1,sizepop), 'chrom',[]);  %½«ÖÖÈºÐÅÏ¢¶¨ÒåÎªÒ»¸ö½á¹¹Ìå
avgfitness=[];                      %Ã¿Ò»´úÖÖÈºµÄÆ½¾ùÊÊÓ¦¶È
bestfitness=[];                     %Ã¿Ò»´úÖÖÈºµÄ×î¼ÑÊÊÓ¦¶È
bestchrom=[];                       %ÊÊÓ¦¶È×îºÃµÄÈ¾É«Ìå
%³õÊ¼»¯ÖÖÈº
for i=1:sizepop
    %Ëæ»ú²úÉúÒ»¸öÖÖÈº
    individuals.chrom(i,:)=Code(lenchrom,bound);    %±àÂë£¨binaryºÍgreyµÄ±àÂë½á¹ûÎªÒ»¸öÊµÊý£¬floatµÄ±àÂë½á¹ûÎªÒ»¸öÊµÊýÏòÁ¿£©
    x=individuals.chrom(i,:);
    %¼ÆËãÊÊÓ¦¶È
    individuals.fitness(i)=fun(x);   %È¾É«ÌåµÄÊÊÓ¦¶È
end

%ÕÒ×îºÃµÄÈ¾É«Ìå
[bestfitness bestindex]=min(individuals.fitness);
bestchrom=individuals.chrom(bestindex,:);  %×îºÃµÄÈ¾É«Ìå
avgfitness=sum(individuals.fitness)/sizepop; %È¾É«ÌåµÄÆ½¾ùÊÊÓ¦¶È
% ¼ÇÂ¼Ã¿Ò»´ú½ø»¯ÖÐ×îºÃµÄÊÊÓ¦¶ÈºÍÆ½¾ùÊÊÓ¦¶È
trace=[avgfitness bestfitness];
% ½ø»¯¿ªÊ¼
for i=1:maxgen
    % Ñ¡Ôñ
    individuals=Select(individuals,sizepop); 
    avgfitness=sum(individuals.fitness)/sizepop;
    % ½»²æ
    individuals.chrom=Cross(pcross,lenchrom,individuals.chrom,sizepop,bound);
    % ±äÒì
    individuals.chrom=Mutation(pmutation,lenchrom,individuals.chrom,sizepop,i,maxgen,bound);
    % ¼ÆËãÊÊÓ¦¶È 
    for j=1:sizepop
        x=individuals.chrom(j,:); %½âÂë
        individuals.fitness(j)=fun(x);   
    end
    %ÕÒµ½×îÐ¡ºÍ×î´óÊÊÓ¦¶ÈµÄÈ¾É«Ìå¼°ËüÃÇÔÚÖÖÈºÖÐµÄÎ»ÖÃ
    [newbestfitness,newbestindex]=max(individuals.fitness);
    [worestfitness,worestindex]=min(individuals.fitness);
    % ´úÌæÉÏÒ»´Î½ø»¯ÖÐ×îºÃµÄÈ¾É«Ìå
    if bestfitness<newbestfitness
        bestfitness=newbestfitness;
        bestchrom=individuals.chrom(newbestindex,:);
    end
    x=bestchrom;
    M1(1,i)=x(1,1);
    M3(1,i)=x(1,2);   
    K3(1,i)=1000*x(1,3);
    C3(1,i)=100*x(1,4);
    K4(1,i)=1000*x(1,5);
    C4(1,i)=10*x(1,6);
    K6(1,i)=1000*x(1,7);
    C6(1,i)=1000*x(1,8);
    individuals.chrom(worestindex,:)=bestchrom;
    individuals.fitness(worestindex)=bestfitness;
    avgfitness=sum(individuals.fitness)/sizepop;
    trace=[trace;avgfitness bestfitness]; %¼ÇÂ¼Ã¿Ò»´ú½ø»¯ÖÐ×îºÃµÄÊÊÓ¦¶ÈºÍÆ½¾ùÊÊÓ¦¶È

end
% ÒÅ´«Ëã·¨½á¹û·ÖÎö
 figure(11)
[r c]=size(trace);
plot([1:r]',trace(:,2),'bs-');
disp('ÊÊÓ¦¶È                   ±äÁ¿');
disp(['m1=',num2str(x(1,1),'%1.5f')]);   %£¡£¡£¡£¡£¡£¡£¡£¡»­Í¼Ê±Á½¸öXµÄµã
disp(['m3=',num2str(x(1,2),'%1.5f')]); 
disp(['k3=',num2str(1000*x(1,3),'%1.5f')]); 
disp(['c3=',num2str(100*x(1,4),'%1.5f')]); 
disp(['k4=',num2str(1000*x(1,5),'%1.5f')]); 
disp(['c4=',num2str(10*x(1,6),'%1.5f')]); 
disp(['k6=',num2str(1000*x(1,7),'%1.5f')]); 
disp(['c6=',num2str(1000*x(1,8),'%1.5f')]); 
figure(12)
hold on
plot(1:maxgen,M1,'*-');
ylabel('m1£©');
xlabel('µü´ú´ÎÊý');
figure(13)
hold on
plot(1:maxgen,M3,'*-');  
ylabel('m3');
figure(14)
hold on
plot(1:maxgen,K3,'*-'); 
ylabel('k3');
figure(15)
hold on
plot(1:maxgen,C3,'*-');   
ylabel('c3');
figure(16)
hold on
plot(1:maxgen,K4,'*-'); 
ylabel('k4');
figure(17)
hold on
plot(1:maxgen,C4,'*-'); 
ylabel('c4');
figure(18)
hold on
plot(1:maxgen,K6,'*-');
ylabel('k6');
figure(19)
hold on
plot(1:maxgen,C6,'*-');
ylabel('c6');
toc
