# Supplementary material for: Integrated Vibration Control of In‐Wheel Motor‐Suspensions Coupling System via Dynamics Parameter Optimization
Source: Hindawi journal article supplement (doi:10.1155/2019/3702919), 2019-01-01
Supplement: f1 [file 3702919.f1.zip › 3702919.f1/MATLAB Codes/GA/Mutation.m]

function ret=Mutation(pmutation,lenchrom,chrom,sizepop,num,maxgen,bound)
% ±¾º¯ÊýÍê³É±äÒì²Ù×÷
% pmutation             input  : ±äÒì¸ÅÂÊ
% lenchrom              input  : È¾É«Ìå³¤¶È
% chrom                 input  : È¾É«ÌåÈº
% sizepop               input  : ÖÖÈº¹æÄ£
% opts                  input  : ±äÒì·½·¨µÄÑ¡Ôñ
% pop                   input  : µ±Ç°ÖÖÈºµÄ½ø»¯´úÊýºÍ×î´óµÄ½ø»¯´úÊýÐÅÏ¢
% bound                 input  : Ã¿¸ö¸öÌåµÄÉÏ½ìºÍÏÂ½ì
% maxgen                input  £º×î´óµü´ú´ÎÊý
% num                   input  : µ±Ç°µü´ú´ÎÊý
% ret                   output : ±äÒìºóµÄÈ¾É«Ìå
for i=1:sizepop   %Ã¿Ò»ÂÖforÑ­»·ÖÐ£¬¿ÉÄÜ»á½øÐÐÒ»´Î±äÒì²Ù×÷£¬È¾É«ÌåÊÇËæ»úÑ¡ÔñµÄ£¬±äÒìÎ»ÖÃÒ²ÊÇËæ»úÑ¡ÔñµÄ£¬
                  %µ«¸ÃÂÖforÑ­»·ÖÐÊÇ·ñ½øÐÐ±äÒì²Ù×÷ÔòÓÉ±äÒì¸ÅÂÊ¾ö¶¨£¨continue¿ØÖÆ£©
                  % Ëæ»úÑ¡ÔñÒ»¸öÈ¾É«Ìå½øÐÐ±äÒì
    pick=rand(1,2);
    while pick==0
        pick=rand;
    end
    index=ceil(pick*sizepop);
    % ±äÒì¸ÅÂÊ¾ö¶¨¸ÃÂÖÑ­»·ÊÇ·ñ½øÐÐ±äÒì
    pick=rand;
    if pick>pmutation
        continue;
    end
    flag=0;
    while flag==0
        % ±äÒìÎ»ÖÃ
        pick=rand;
        while pick==0      
            pick=rand;
        end
        pos=ceil(pick*sum(lenchrom));  %Ëæ»úÑ¡ÔñÁËÈ¾É«Ìå±äÒìµÄÎ»ÖÃ£¬¼´Ñ¡ÔñÁËµÚpos¸ö±äÁ¿½øÐÐ±äÒì
    
        pick=rand; %±äÒì¿ªÊ¼     
        fg=(rand*(1-num/maxgen))^2;
        if pick>0.5
            chrom(i,pos)=chrom(i,pos)+(bound(pos,2)-chrom(i,pos))*fg;
        else
            chrom(i,pos)=chrom(i,pos)-(chrom(i,pos)-bound(pos,1))*fg;
        end   %±äÒì½áÊø
        flag=test(lenchrom,bound,chrom(i,:));     %¼ìÑéÈ¾É«ÌåµÄ¿ÉÐÐÐÔ
    end
end
ret=chrom;
