# Supplementary material for: Integrated Vibration Control of In‐Wheel Motor‐Suspensions Coupling System via Dynamics Parameter Optimization
Source: Hindawi journal article supplement (doi:10.1155/2019/3702919), 2019-01-01
Supplement: f1 [file 3702919.f1.zip › 3702919.f1/MATLAB Codes/GA/odemain2.m]

function FC=odemain2(X)
%ÊäÈë£º
%X      
%i      ÐòºÅ
%Êä³ö£º
%FC     ÓÅ»¯º¯ÊýµÄº¯ÊýÖµ
global a e w m1 m2 m3 m4 m5 k1 c1 k2 c2 k3 c3 k4 c4 k5 c5 k6 c6 k7 c7 ;
m2=5;                               % m2=³µÖáÖÊÁ¿
m4=18;                          % m4=ÂÖì±µç»ú¶¨×ÓÖÊÁ¿
m5=12;                          % m5=ÂÖì±µç»ú×ª×ÓÖÊÁ¿
k1=250000;c1=375;                   % k1/c1=ÂÖÌ¥ÓëµØÃæ¸Õ¶È/×èÄá
k2=5120000;c2=0;                    % k2/c2=ÂÖì±Öá³Ð¸Õ¶È/×èÄá
k5=5000000;c5=0;                    % k5/c5=¶¨×ÓÓë×ª×Ó¼äÖá³Ð¸Õ¶È/×èÄá
k7=1000*150;c7=450;      % k7/c7=×ª×ÓÓëÂÖÌ¥Á¬½Ó¼þ¸Õ¶È/×èÄá
m1=X(1,1);                          % m1=ÂÖÌ¥ÖÊÁ¿£¨³ýÈ¥ÂÖì±µç»ú£©
m3=X(1,2);                          % m3=ËÄ·ÖÖ®Ò»³µÉíÖÊÁ¿
k3=1000*X(1,3);c3=100*X(1,4);         % k3/c3=Ðü¼Ü¸Õ¶È/×èÄá
k4=1000*X(1,5);c4=10*X(1,6);         % k4/c4=¶¨×ÓÓë³µÉí¼äµ¯»É¸Õ¶È/×èÄá
k6=1000*X(1,7);c6=1000*X(1,8);      % k6/c6=¶¨×ÓÓë³µÖá¼äµ¯»É¸Õ¶È/×èÄá
f=[];
y0=[0 0 0 0 0 0 0 0 0 0];
tspan=[0 5];
a=0.05;w=10/9;e=0.5;
[t,y]=ode15s('func',tspan,y0);
FA=(c3*(y(:,6)-y(:,4))+c4*(y(:,6)-y(:,8))+k3*(y(:,5)-y(:,3))+k4*(y(:,5)-y(:,7)))/(-m3);
FB=(y(:,1)-a*(cos(2*pi*w*t)-1));
FC=(y(:,5)-y(:,3));
FD=(y(:,9)-y(:,7));
SA=FA.^2;
SB=FB.^2;
SC=FC.^2;
SD=FD.^2;
RMS1=sqrt(sum(SA.^2)/size(SA,1));
RMS2=sqrt(sum(SB.^2)/size(SB,1));
RMS3=sqrt(sum(SC.^2)/size(SC,1));
RMS4=sqrt(sum(SD.^2)/size(SD,1));
smf1=sum(SA)/RMS1;
smf2=sum(SB)/RMS2;
smf3=sum(SC)/RMS3;
smf4=sum(SD)/RMS4;
FC=0.25*smf1+0.2*smf2+0.2*smf3+0.35*smf4;
