# Supplementary material for: Integrated Vibration Control of In‐Wheel Motor‐Suspensions Coupling System via Dynamics Parameter Optimization
Source: Hindawi journal article supplement (doi:10.1155/2019/3702919), 2019-01-01
Supplement: f1 [file 3702919.f1.zip › 3702919.f1/MATLAB Codes/GA/Select.m]

function ret=select(individuals,sizepop)
% ¸Ãº¯ÊýÓÃÓÚ½øÐÐÑ¡Ôñ²Ù×÷
% individuals input    ÖÖÈºÐÅÏ¢
% sizepop     input    ÖÖÈº¹æÄ£
% ret         output   Ñ¡ÔñºóµÄÐÂÖÖÈº

%ÇóÊÊÓ¦¶ÈÖµµ¹Êý   
fitness1=1./individuals.fitness; %individuals.fitnessÎª¸öÌåÊÊÓ¦¶ÈÖµ

%¸öÌåÑ¡Ôñ¸ÅÂÊ
sumfitness=sum(fitness1);
sumf=fitness1./sumfitness;

%²ÉÓÃÂÖÅÌ¶Ä·¨Ñ¡ÔñÐÂ¸öÌå
index=[]; 
for i=1:sizepop   %sizepopÎªÖÖÈºÊý
    pick=rand;
    while pick==0    
        pick=rand;        
    end
    for j=1:sizepop    
        pick=pick-sumf(j);        
        if pick<0        
            index=[index j];            
            break;  
        end
    end
end
%ÐÂÖÖÈº
individuals.chrom=individuals.chrom(index,:);   %individuals.chromÎªÖÖÈºÖÐ¸öÌå
individuals.fitness=individuals.fitness(index);
ret=individuals;
