# Supplementary material for: Integrated Vibration Control of In‐Wheel Motor‐Suspensions Coupling System via Dynamics Parameter Optimization
Source: Hindawi journal article supplement (doi:10.1155/2019/3702919), 2019-01-01
Supplement: f1 [file 3702919.f1.zip › 3702919.f1/MATLAB Codes/GA/test.m]

function flag=test(lenchrom,bound,code)
% lenchrom   input : È¾É«Ìå³¤¶È
% bound      input : ±äÁ¿µÄÈ¡Öµ·¶Î§
% code       output: È¾É«ÌåµÄ±àÂëÖµ
x=code; %ÏÈ½âÂë
flag=1;
% if (x(1)<0)&&(x(2)<0)&&(x(3)<0)&&(x(1)>bound(1,2))&&(x(2)>bound(2,2))&&(x(3)>bound(3,2))
%     flag=0;
% end     
