# Supplementary material for: Integrated Vibration Control of In‐Wheel Motor‐Suspensions Coupling System via Dynamics Parameter Optimization
Source: Hindawi journal article supplement (doi:10.1155/2019/3702919), 2019-01-01
Supplement: f1 [file 3702919.f1.zip › 3702919.f1/MATLAB Codes/SIMULATION/bump road excitation/func.m]

function dy=func(t,y)
global m1 e m2 m3 m4 m5 k1 c1 k2 c2 k3 c3 k4 c4 k5 c5 k6 c6 k7 c7;
dy=zeros(10,1)
dy(1)=y(2);
dy(2)=(c1*(y(2)-(0.1*pi*sin(pi*2*t).*(t>=0 & t<=1)+0.*(t>1)))+c2*(y(2)-y(4))+c7*(y(2)-y(10))+k1*(y(1)-(0.05*(1-cos(pi*2*t)).*(t>=0 & t<=1)+0.*(t>1)))+e*k1*(y(1)-(0.05*(1-cos(pi*2*t)).*(t>=0 & t<=1)+0.*(t>1)))^3+k2*(y(1)-y(3))+k7*(y(1)-y(9)))/(-m1);
dy(3)=y(4);
dy(4)=(c2*(y(4)-y(2))+c3*(y(4)-y(6))+c6*(y(4)-y(8))+k2*(y(3)-y(1))+k3*(y(3)-y(5))+e*k3*(y(3)-y(5))^3+k6*(y(3)-y(7)))/(-m2);
dy(5)=y(6);
dy(6)=(c3*(y(6)-y(4))+c4*(y(6)-y(8))+k3*(y(5)-y(3))+e*k3*(y(5)-y(3))^3+k4*(y(5)-y(7)))/(-m3);
dy(7)=y(8);
dy(8)=(c4*(y(8)-y(6))+c5*(y(8)-y(10))+c6*(y(8)-y(4))+k4*(y(7)-y(5))+k5*(y(7)-y(9))+k6*(y(7)-y(3)))/(-m4);
dy(9)=y(10);
dy(10)=(c5*(y(10)-y(8))+c7*(y(10)-y(2))+k5*(y(9)-y(7))+k7*(y(9)-y(1)))/(-m5);
