# Supplementary material for: Integrated Vibration Control of In‐Wheel Motor‐Suspensions Coupling System via Dynamics Parameter Optimization
Source: Hindawi journal article supplement (doi:10.1155/2019/3702919), 2019-01-01
Supplement: f1 [file 3702919.f1.zip › 3702919.f1/MATLAB Codes/SIMULATION/bump road excitation/odemain.m]

clc
clear all
figure(20);
title('³µÉí´¹Ö±Õñ¶¯¼ÓËÙ¶È');
figure(21);
title('³µÉí´¹Ö±Õñ¶¯Î»ÒÆ');
figure(22);
title('Ðü¼ÜÐÐ³Ì');
figure(23);
title('¶¨×ª×Ó¼äÏà¶ÔÎ»ÒÆ');
figure(24);
title('ÂÖÌ¥¸ºÔØ');
global a w e m1 m2 m3 m4 m5 k1 c1 k2 c2 k3 c3 k4 c4 k5 c5 k6 c6 k7 c7;
a=0.05;w=25/18;e=0.5;
m2=5;
m4=18;
m5=12;
k1=250000;c1=375;
k2=5120000;c2=0;
k5=5000000;c5=0;
k7=150000;
c7=450;
m1=55;
m3=337;
k3=25000;
c3=800;
k4=15000;
c4=100;
k6=10000;
c6=15000;
y0=[0 0 0 0 0 0 0 0 0 0];
tspan=[0 5];
[t,y]=ode15s('func',tspan,y0);
FA=(c3*(y(:,6)-y(:,4))+c4*(y(:,6)-y(:,8))+k3*(y(:,5)-y(:,3))+k4*(y(:,5)-y(:,7)))/(-m3);
FB=y(:,5);
FC=(y(:,5)-y(:,3));
FD=(y(:,9)*1000-y(:,7)*1000);
FE=((0.05*(1-cos(pi*2*t)).*(t>=0 & t<=1)+0.*(t>1))-y(:,1))*k1;
SA=FA.^2;
SD=FD.^2;
RMS11=sqrt(sum(FA.^2)/size(FA,1));
RMS14=sqrt(sum(FD.^2)/size(FD,1));
figure(20)
hold on
o1=plot(t,FA,':k','LineWidth',1);
legend(o1,'Original');
figure(21)
hold on
o2=plot(t,FB,':k','LineWidth',1);
legend(o2,'Original');
figure(23)
hold on
o3=plot(t,FC,':k','LineWidth',1);
legend(o3,'Original');
figure(22)
hold on
o4=plot(t,FD,':k','LineWidth',1);
legend(o4,'Original');
figure(24)
hold on
o5=plot(t,FE,':k','LineWidth',1);
legend(o5,'Original');
m1=56.04275;
m3=347.26378;
k3=25983.27836;
c3=1911.81506;
k4=26064.28810;
c4=623.25510;
k6=26016.65093;
c6=17197.63368;
y0=[0 0 0 0 0 0 0 0 0 0];
tspan=[0 5];
[t,y]=ode15s('func',tspan,y0);
FA=(c3*(y(:,6)-y(:,4))+c4*(y(:,6)-y(:,8))+k3*(y(:,5)-y(:,3))+k4*(y(:,5)-y(:,7)))/(-m3);
FB=y(:,5);
FC=(y(:,5)-y(:,3));
FD=(y(:,9)*1000-y(:,7)*1000);
FE=((0.05*(1-cos(pi*2*t)).*(t>=0 & t<=1)+0.*(t>1))-y(:,1))*k1;
RMS21=sqrt(sum(FA.^2)/size(FA,1));
RMS24=sqrt(sum(FD.^2)/size(FD,1));
figure(20)
hold on
g1=plot(t,FA,'--b','LineWidth',1.5);
legend(g1,'GA');
figure(21)
hold on
g2=plot(t,FB,'--b','LineWidth',1.5);
legend(g2,'GA');
figure(23)
hold on
g3=plot(t,FC,'--b','LineWidth',1.5);
legend(g3,'GA');
figure(22)
hold on
g4=plot(t,FD,'--b','LineWidth',1.5);
legend(g4,'GA');
figure(24)
hold on
g5=plot(t,FE,'--b','LineWidth',1.5);
legend(g5,'GA');
m1=60;
m3=312.8323;
k3=80000;
c3=2000;
k4=13952.1316;
c4=800;
k6=17837.5841;
c6=13287.0076;
y0=[0 0 0 0 0 0 0 0 0 0];
tspan=[0 5];
[t,y]=ode15s('func',tspan,y0);
FA=(c3*(y(:,6)-y(:,4))+c4*(y(:,6)-y(:,8))+k3*(y(:,5)-y(:,3))+k4*(y(:,5)-y(:,7)))/(-m3);
FB=y(:,5);
FC=(y(:,5)-y(:,3));
FD=(y(:,9)*1000-y(:,7)*1000);
FE=((0.05*(1-cos(pi*2*t)).*(t>=0 & t<=1)+0.*(t>1))-y(:,1))*k1;
RMS31=sqrt(sum(FA.^2)/size(FA,1));
RMS34=sqrt(sum(FD.^2)/size(FD,1));
figure(20)
hold on
a1=plot(t,FA,'r','LineWidth',2);
legend(a1,'AFSA');
figure(21)
hold on
a2=plot(t,FB,'r','LineWidth',2);
legend(a2,'AFSA');
figure(23)
hold on
a3=plot(t,FC,'r','LineWidth',2);
legend(a3,'AFSA');
figure(22)
hold on
a4=plot(t,FD,'r','LineWidth',2);
legend(a4,'AFSA');
figure(24)
hold on
a5=plot(t,FE,'r','LineWidth',2);
legend(a5,'AFSA');
RMS11
RMS14
RMS21
RMS24
RMS31
RMS34
